1 **Co-evolution of functional motifs and H2A.X in the context of DNA damage**  
2 **response identifies the plant Mediator of DNA Damage Checkpoint 1**

3

4 **Zdravko J. Lorković,<sup>1,\*</sup> Michael Klingenbrunner,<sup>1,2</sup> Chung Hyun Cho,<sup>3</sup> and**  
5 **Frédéric Berger<sup>1,\*</sup>**

6

7 <sup>1</sup>Gregor Mendel Institute (GMI), Austrian Academy of Sciences, Vienna Biocenter  
8 (VBC), Vienna, Austria

9 <sup>2</sup>Department of Molecular Life Sciences, University of Zurich, Switzerland

10 <sup>3</sup>Department of Biological Sciences, Sungkyunkwan University, Suwon, South Korea

11

12

13

14

15

16

17 Correspondence to:

18 Frédéric Berger and Zdravko J. Lorković Gregor Mendel Institute (GMI), Austrian  
19 Academy of Sciences, Vienna Biocenter (VBC), Dr. Bohrgasse 3, 1030 Vienna,  
20 Austria [frederic.berger@gmi.oeaw.ac.at](mailto:frederic.berger@gmi.oeaw.ac.at) and [zdravko.lorkovic@gmi.oeaw.ac.at](mailto:zdravko.lorkovic@gmi.oeaw.ac.at).

21

22

23

24

25

26

27 Running title: DDR mediator MDC1 in plants

28

29 Key words: BRCT domain/DNA damage response/histone H2A.X/MDC1

30

31

32

33

34

35 **Abstract**

36 The DNA damage response (DDR) requires a complex network of proteins that  
37 detect DNA damage, promote repair, and coordinate DNA repair with the cell cycle.  
38 The SQEF/Y C-terminal motif of histone H2A.X is rapidly phosphorylated ( $\gamma$ H2A.X)  
39 upon induction of DNA damage. However, readers of this modification in plants have  
40 remained elusive. In animals mediator of DNA damage checkpoint 1 (MDC1) binds  
41  $\gamma$ H2A.X through a BRCA1 carboxyl-terminal (BRCT) domain. Individual BRCT  
42 domains or tandem BRCT domains (tBRCT) bind phosphorylated peptides and are  
43 predominantly associated with proteins involved in the DDR. Here, we performed a  
44 systematic analysis of BRCT domain proteome in *Arabidopsis*. Among 21 BRCT  
45 domain proteins, we identified BCP4 as a candidate ortholog of human MDC1. The  
46 C-terminal tBRCT domain of BCP4 bound  $\gamma$ H2A.X *in vitro* and BCP4 localized into  
47 DNA damage-induced foci that were H2A.X dependent. We also show that although  
48 BCP1 has a dual tBRCT domain protein, it does not bind to  $\gamma$ H2A.X, but co-localizes  
49 with  $\gamma$ H2A.X in DNA damage-induced foci suggesting its function downstream of  
50  $\gamma$ H2A.X recognition. This along with tBRCT sequence similarities makes BCP1  
51 functionally related to human PAXIP1. BCP1 and BCP4 are conserved in multicellular  
52 plants, and their evolution in Archaeplastida coincides with the acquisition of H2A.X  
53 in multicellular streptophytes. We conclude that BCP1 and BCP4 in plants and  
54 PAXIP1 and MDC1 in metazoa evolved independently from common ancestors with  
55 tBRCT domains.

56

57

58

59

60

61

62

63

64

65

66

67

68

69

## 70 **Introduction**

71 The genome is constantly exposed to endogenous or exogenous sources of  
72 genotoxic agents, which cause DNA damage. Among different types of DNA  
73 damage, DNA double-strand breaks (DSBs) are considered to be the most  
74 deleterious as they can cause genome rearrangements if not accurately repaired. To  
75 prevent such harmful consequences, the DNA damage response (DDR) pathway  
76 senses DNA damage and initiates a signaling cascade by attracting sensor,  
77 transducer, mediator, and effector repair proteins to the site of DNA damage (Ciccìa  
78 and Elledge 2010).

79 Major protein factors contributing to signaling and repair of damaged DNA  
80 have been characterized (Ciccìa and Elledge 2010; Ferrand *et al.*, 2020). The earliest  
81 step in DDR is recruitment of the MRE11-RAD50-NBS1 (MRN) complex which  
82 senses and locates sites of DSBs. Stalled replication forks are sensed by replication  
83 protein A, which binds to ssDNA generated at the site of stalled replication forks.  
84 These initial events lead to the recruitment of ATM and ATR kinases that  
85 phosphorylate a plethora of proteins acting downstream of DNA damage sensing  
86 (Lanz *et al.*, 2019). Among these, the histone variant H2A.X is rapidly phosphorylated  
87 at its C-terminal SQ motif (SQEF/Y), manifested as numerous  $\gamma$ H2A.X foci  
88 throughout the nucleus (Turinetto and Giachino 2015; Ferrand *et al.*, 2020). These  
89 early events during DDR are conserved in opisthokonts (e.g. fungi, animals) and  
90 plants (Lorković and Berger, 2017; Nisa *et al.*, 2019).

91 In mammals,  $\gamma$ H2A.X promotes DDR by binding mediator of DNA damage  
92 checkpoint protein 1 (MDC1) (Stewart *et al.*, 2003), which acts as a scaffold for DDR  
93 effectors (Coster and Goldberg 2010). DDR effectors often contain BRCA1 C  
94 terminus (BRCT) domains, which are present either as a single domain or two closely  
95 spaced tandem domains (tBRCT). tBRCT domains represent a distinct class of  
96 BRCT domains that bind phosphorylated target proteins (Leung and Glover, 2011).  
97 MDC1 interacts with  $\gamma$ H2A.X through its C-terminal tBRCT domain (Stucki *et al.*,  
98 2005). In addition to the tBRCT domain, human MDC1 harbors four additional  
99 interaction domains/motifs. The N-terminal forkhead-associated (FHA) domain  
100 interacts with additional MDC1 molecules and RAD51 (Zhang *et al.*, 2005). The FHA  
101 domain is followed by SDTD motifs which, when phosphorylated by casein kinase II,  
102 bind NBS1 of the MRN complex (Chapman and Jackson, 2008; Spycyher *et al.*, 2008;

103 Hari *et al.*, 2010; Kim *et al.*, 2011). Binding of MRN complexes to MDC1 recruits  
104 additional ATM molecules, which further phosphorylate neighboring H2A.X proteins.  
105 Thus, MDC1 facilitates the spread of the DDR signal as far as one megabase up-  
106 and downstream of the initial DSB (Rogakou *et al.*, 1999; Lou *et al.*, 2006; Turinetto  
107 and Giachino 2015). ATM also phosphorylates the TQxF motifs of MDC1, allowing  
108 recruitment of ring finger protein 8 (RNF8) (Kolas *et al.*, 2007; Mailand *et al.*, 2007),  
109 which ubiquitylates H2A/H2A.X proteins in its vicinity. These ubiquitylation marks are  
110 recognized by ring finger protein 168 which results in further ubiquitylation of  
111 H2A/H2A.X and chromatin relaxation around DNA damage site, which makes the  
112 underlying DNA accessible for DNA repair factors (Ferrand *et al.*, 2020). PST repeats  
113 of MDC1 act as a docking site for TP53BP1 (Salguero *et al.*, 2019), a tBRCT domain  
114 protein that in concerted action with RNF8 is necessary for recruitment of another  
115 tBRCT domain-containing DDR effector, PAXIP1 (Munoz *et al.*, 2007; Gong *et al.*,  
116 2009). This complex network of DDR factor interactions is necessary for the  
117 recruitment of repair machineries and influences the choice of DNA repair pathway  
118 (Callen *et al.*, 2013; Escribano-Diaz and Durocher 2013; Ferrand *et al.*, 2020; Mirman  
119 and de Lange 2020).

120 BRCT domain is a hallmark of proteins participating in DDR (Callebaut and  
121 Mornon 1997; Leung and Glover 2011). Among DDR mediator/effector proteins that  
122 contain BRCT domains (BRCA1, BARD1, TP53BP1, MDC1, TOPBP1, and PAXIP1)  
123 only BRCA1 and BARD1 were described in plant lineage (Lafarge and Montane  
124 2003; Reidt *et al.*, 2006). Thus, how phosphorylated H2A.X is recognized and how  
125 this signal mediates recruitment of DNA damage repair machineries in plant cells  
126 remains elusive. To identify the readers of phosphorylated H2A.X, we used a minimal  
127 complement of human BRCT proteins (Woods *et al.*, 2012) to identify a complete set  
128 of *Arabidopsis* BRCT domain-containing proteins. Among the 21 BRCT domain  
129 proteins identified, we found two potential orthologs of MDC1 and characterized this  
130 missing link between DDR signaling and DNA damage repair in plants. Based on a  
131 phylogenetic analysis and functional validations of the MDC1 protein family, we  
132 propose a potential evolutionary scenario for this complex family of proteins.

133

## 134 **Results and Discussion**

### 135 **BRCT domain proteome in plants**

136 Using a combination of search strategies, we identified 21 *Arabidopsis* proteins with  
137 at least one BRCT domain (Figure 1A). Of the 21 proteins identified, 11 were  
138 homologs of human proteins with reported BRCT domains (BRCA1, BARD1, XRCC1,  
139 REV1, PARP1, LIG4, RFC1, DPOLL, CTDP1, NBS and PES1) as revealed by  
140 clustering of *Arabidopsis* and human homologs on the unrooted phylogenetic tree  
141 (Figure 1B), which also reflected homology beyond the BRCT domains. Overall, the  
142 domain organization of *Arabidopsis* BRCT proteins mirrored that of the human  
143 homologs, with some exceptions: AtPARP1 contains two Zinc fingers at the N-  
144 terminus that are missing in the human protein; the AtBRCA1 and AtBARD1  
145 orthologs have extended PHD fingers in front of the BRCT domain (Figure 1A); the  
146 AtCPL4, a CTDP1-like phosphatase contains a BRCT domain absent in the human  
147 ortholog; and the absence of a BRCT domain in the AtPARP4 although this domain  
148 is present in PARP3. We could not find proteins with combinations and order of  
149 domains present in the human proteins MCPH1, POLM, DBF4B, LIG3, DNNT,  
150 PAXIP1, ANKRD32, TP53BP1, TOPBP1, and MDC1. The absence of TP53BP1 is  
151 not surprising as p53 itself is not present in plant lineage, rather its function is  
152 replaced by the plant-specific protein SOG1 (Yoshiyama *et al.*, 2009; Yoshiyama,  
153 2016). The function of TOPBP1, with seven BRCT domains, may be mediated by  
154 AtMEI1, which contains only five BRCT domains. Two additional *Arabidopsis* proteins  
155 containing two BRCT domains at the N-terminal half of the protein, which we named  
156 TOPBP-LIKE1 (TOPBPL1) and TOPBP-LIKE2 (TOPBPL2), showed the best  
157 homology to TOPBP1 and clustered together with AtMEI1 and human TOPBP1  
158 (Figure 1B). Sumo targeted ubiquitin ligase 2 (STUbL2), with one BRCT domain at  
159 the N terminus, a RING finger, and an unannotated PHD finger at the C-terminus  
160 (Figure 1A), has been identified as a suppressor of heterochromatin over-replication  
161 caused by the loss of the histone K27 methyltransferases ATXR5 and 6 (Hale *et al.*,  
162 2016). STUbL2 is most closely related to the human RNF8. Instead of a BRCT  
163 domain, RNF8 has an FHA domain at the N-terminus and a RING finger at the C-  
164 terminus. The FHA domain predominantly binds phospho-threonine (Durocherr and  
165 Jackson, 2002) while the BRCT domain preferentially binds phospho-serine (Manke  
166 *et al.*, 2003) suggesting that the two proteins have distinct targets.

167 Four BRCT domain proteins, BCP1-BCP4, were also identified while this work  
168 was in progress (Vladejić *et al.*, 2022). BCP2, with a histone acetyl transferase  
169 domain, appears to be a plant specific BRCT domain protein of unknown function.

170 The three other BRCT-domain proteins (BCP1, BCP3, and BCP4) did not reveal an  
171 obvious domain organization comparable to any human protein. BCP1, BCP3, and  
172 BCP4 were conserved in all plant lineages analyzed, with separation of clades  
173 corresponding to algae, non-flowering land plants, basal angiosperms, monocots,  
174 and dicots (Supporting Figure S1A and S1B). BCP3 and BCP4 appear to be paralogs  
175 that arose from genome duplication events, as shown by their same exon-intron  
176 arrangements (Supporting Figure S2A and S2B). Algae, non-flowering land plants,  
177 gymnosperms, and basal angiosperms contain only one BCP3/4 protein, suggesting  
178 that this gene duplication took place with the appearance of eudicots.

179 BCP1 has two tBRCT domains positioned at the N- and C-terminus and a so  
180 far unrecognized C-terminal PHD finger which is present in all plant lineages except  
181 Brassicaceae (Supporting Figure S1A and S3). BCP3 and BCP4, which both have a  
182 tBRCT domain at the C-terminus, showed limited homology with tBRCT domains of  
183 human MDC1 and PAXIP1 proteins (Figure 1B and 1C). On an unrooted  
184 phylogenetic tree, these two proteins clustered with MDC1 and PAXIP1 (Figure 1B).  
185 Next, we selected all *Arabidopsis* and human tBRCT domains and created another  
186 unrooted tree. This confirmed that tBRCT domains from homologous proteins cluster  
187 together (Figure 1D) as was the case when the entire protein sequences were used  
188 (Figure 1B). Importantly, *Arabidopsis* tBRCT domains from BCP3 and BCP4  
189 clustered with tBRCT of human MDC1 and PAXIP1 (Figure 1D). BCP3 and BCP4  
190 contained only two BRCT domains in contrast to the six BRCT domains present in  
191 PAXIP1 (Jowsey *et al.*, 2004) and did not contain long stretches of glutamine (Figure  
192 1A), suggesting that they are not PAXIP1 homologs and that BCP3 and BCP4 might  
193 play a role in recognizing  $\gamma$ H2A.X like MDC1.

194

### 195 **DNA damage sensitivity and DDR of *BCP* mutants**

196 To analyze the potential role of BCPs in DDR, we obtained T-DNA insertion mutants  
197 of *BCP1-4* (Supporting Figure S2A) and measured their sensitivity to DNA damage.  
198 Mutants deprived of H2A.X (*hta3 hta5*) or H2A.W.7 (*hta7*) with demonstrated DNA  
199 damage sensitivity (Lorković *et al.*, 2017) along with the WT were used as controls. In  
200 contrast to recently published data (Vladejić *et al.*, 2022), all *bcp* alleles were  
201 sensitive to the zeocin that causes DSBs (Figure 2A). *bcp3* was not as sensitive as  
202 *bcp1*, *bcp2*, or *bcp4* (Figure 2A), presumably because the T-DNA insertion in *bcp3* is

203 located in the 5'-UTR (Supporting Figure S2A) and likely did not completely knock out  
204 BPC3.

205 We also assessed DNA damage response in *bcp* mutants by observing the  
206 levels of  $\gamma$ H2A.X in response to a two-hour treatment of seedlings with bleomycin. In  
207 all mutant alleles, levels of  $\gamma$ H2A.X were not significantly reduced compared to WT  
208 seedlings (Figure 2B). Nuclei from bleomycin treated seedlings did not show an  
209 obvious difference in either the number or size of  $\gamma$ H2A.X foci between the *bcp*  
210 mutants and WT (Figure 2C), suggesting that BCP proteins are not required for either  
211 the initiation or propagation of  $\gamma$ H2A.X, in agreement with their function as readers of  
212  $\gamma$ H2A.X.

213 We next complemented loss of function mutants *bcp1*, *bcp3*, and *bcp4* with  
214 BCP1-mClover3, BCP3-mClover3, and BCP4-mClover3 fusion proteins. Transgenic  
215 lines expressing mClover3-tagged genomic constructs were not sensitive to zeocin,  
216 confirming that the sensitivity in these mutant alleles was due to the absence of  
217 functional BCP proteins (Figure 2D). Together, these data establish that BCP1-4 are  
218 required for proper DDR in *Arabidopsis*.

219

## 220 **BCP4 binds $\gamma$ H2A.X and colocalizes with $\gamma$ H2A.X foci after induction of DDR**

221 Phylogenetic analysis revealed that BCP3 and BCP4 were most closely related to  
222 human MDC1 and PAXIP1 (Figure 1B and 1D). To test whether BCPs share  
223 functional properties with these two proteins, we performed two sets of experiments,  
224 *in vitro* phospho-H2A.X peptide binding assays and co-immunostaining of mClover3-  
225 tagged BCPs and  $\gamma$ H2A.X after induction of DSBs with bleomycin.

226 We expressed and purified both C- and N-terminally His<sub>6</sub>-tagged BCP4 from  
227 insect cells and tested its capacity to bind the phosphorylated or unphosphorylated  
228 peptide of comprising 18 C-terminal amino acid residues of H2A.X. Affinity pull-down  
229 with unphosphorylated and phosphorylated H2A.X peptides revealed that BCP4  
230 specifically binds phosphorylated H2A.X peptide (Figure 3A). We also performed  
231 peptide binding assays with the GST-tagged tBRCT domain of BCP4, which also  
232 specifically bound the phosphorylated H2A.X peptide (Figure 3B). These results  
233 establish that the C-terminal tBRCT domain of BCP4 directly interacts with the H2A.X  
234 phosphopeptide. In contrast to the tBRCT domain of BCP4, the purified GST-tagged  
235 N- and C-terminal tBRCT domains of BCP1 (tBRCT-N and tBRCT-C) did not interact

236 with the phosphorylated H2A.X peptide (Figure 3C), suggesting that these domains  
237 are not H2A.X phospho-serine binding modules.

238 We used BCP1-mClover3 and BCP4-mClover3 complementing lines and  
239 performed co-immunostaining of mClover3 and  $\gamma$ H2A.X in nuclei from seedlings after  
240 a two-hour treatment with bleomycin. Both BCP1 and BCP4 co-localized with  $\gamma$ H2A.X  
241 in numerous foci (Figure 3D). In *hta3 hta5* double mutant plants, where H2A.X is not  
242 present (Lorković *et al.*, 2017), BCP1-mClover3 (Figure 3E) and BCP4-mClover3  
243 (Figure 3F) did not form foci after bleomycin treatment. Instead, both fusion proteins  
244 were diffusely distributed throughout the nucleoplasm and accumulated in nucleoli,  
245 demonstrating that the formation of BCP1 and BCP4 foci following DSBs induction  
246 depends on  $\gamma$ H2A.X.

247 Our data suggest that co-localization of BCP1 with  $\gamma$ H2A.X foci is not due to  
248 direct  $\gamma$ H2A.X binding but rather due to interaction between BCP1 and other DDR  
249 factor(s). These observations, along with similarities between the tBRCT domains of  
250 BCP1 and PAXIP1 (Figure 1D), suggest that BCP1 may be functionally related to the  
251 metazoan PAXIP1, whose association with DNA damage foci depends on the  
252 presence of MDC1/RNF8 but not on direct interaction with  $\gamma$ H2A.X (Gong *et al.*,  
253 2009; Munoz *et al.*, 2007). In contrast, based on the direct interaction of BCP4 (this  
254 work) and BCP3 (Fan *et al.*, 2022) with  $\gamma$ H2A.X and their co-localization with  $\gamma$ H2A.X  
255 foci, we conclude that BCP3 and BCP4 have functional properties as human MDC1.

256

### 257 **BCP3 and BCP4 resemble metazoan MDC1 protein features**

258 Although functional analyses and the phylogenetic position indicated that BCP3 and  
259 BCP4 and MDC1 are likely orthologs, BCP3 and BCP4 apparently lack the domains  
260 present N-terminal of the C-terminal tBRCT domain in MDC1 (Figures 1A and 4A).  
261 We thus extended our inspection of BCP3 and BCP4 orthologs across plants to  
262 detect additional domains. The N-terminal intrinsically disordered regions of BCP3  
263 and BCP4 were enriched in the acidic amino acids serine and glutamine but did not  
264 display high sequence conservation among plant species. However, we identified  
265 three regions (SQSQ, DWD, and DTQ) in most species analyzed (Figure 4A and 4B;  
266 Supporting Figure 4A). Two of these motifs carry SQ and TQ dipeptides, which are  
267 potential targets of ATM/ATR kinases. However, the potential functional importance  
268 for these motifs remains to be determined. The DTQ motif was not present in BCP4  
269 from non-flowering land plants and DWD motif was not present in multicellular algae



270 (except *Chara*). In addition, a careful inspection of BCP4 sequence alignments  
271 revealed a variable number (from three to ten, depending on the species) of TQx□  
272 motifs, which resemble TQxF motifs found in human MDC1 (Figure 4A). Thus, the  
273 TQx□ motifs could be functional counterparts of the RNF8 binding domain of human  
274 MDC1. The TQx□ motifs were absent in BCP4 from most multicellular green algae  
275 (except from *Chara* and *Klebsormidium*) (Figure 4B) and were less prominent in  
276 BCPs from bryophytes, lycophytes, and gymnosperms (Figure 4B, open circles).  
277 Along with the presence of TQx□ motifs in BCP4 from basal dicots and their absence  
278 from dicot and monocot BCP3, these data suggested that BCP4 was ancestral and  
279 that the loss of TQx□ motifs in BCP3 evolved recently after gene duplication in  
280 eudicots.

281 Despite sharing similar motifs and tBRCT domains with the human MDC1,  
282 BCP3 and BCP4 had neither the FHA domain nor the SDTD and PST repeats  
283 present in human MDC1 (Figure 4A). The absence of these domains in MUTATOR2,  
284 an MDC1 homolog from *Drosophila*, (Dronamraju and Mason, 2009; Kasravi *et al.*,  
285 1999), prompted us to re-examine the criteria that define MDC1 in eukaryotes. We  
286 analyzed 119 metazoan MDC1 proteins, ranging from sponges to mammals, and  
287 found that all metazoan MDC1 proteins have an FHA domain at the N-terminus and  
288 tBRCT domain at the C-terminus (Figure 4C and Supporting Figure 4B). A full  
289 repertoire of repeats, as in human MDC1 (TQxF, SDTD and PST), was present only  
290 in mammals (Figure 4C and Supporting Figure 4B). In other vertebrates, MDC1  
291 homologs had TQxF and SDTD repeats. In invertebrates, MDC1 had only TQxF  
292 repeats, similar to the plant BCP4. Taken together, our analysis indicates that an  
293 ancestral MDC1 possessed a C-terminal tBRCT domain and that BCP3 and BCP4  
294 can be considered as plant MDC1 homologs that acquired additional domains distinct  
295 to those acquired by MDC1 homologs in vertebrates.

296 To obtain more insights into evolution of BCP1 and BCP4 and their potential  
297 co-evolution with histone H2A variant carrying SQEF/Y motif in plants (referred to as  
298 H2A.X; Malik and Henikoff, 2003), we analyzed the presence of orthologs in  
299 representative taxa from the major clades of Archaeplastida. Histone H2A sequences  
300 possessing a SQEF/Y motif or SQEF-like (SQ+E/D+F/I/L/V/Y) motif at the C-terminus  
301 were present in the most Archaeplastida lineages, except for some unicellular green  
302 algae (e.g., Chlamydomonadales), glaucophytes and extremophilic red algae (Figure  
303 4D). We were not able to unambiguously identify BCP1 and BCP4 proteins in most

304 unicellular green algae (chlorophytes) and glaucophytes (Figure 4D; open boxes).  
305 Red algae lacked any sequences with the signatures of BCP1 and BCP4 or MDC1  
306 from opisthokonts, presumably because genome reduction contributed to massive  
307 gene losses in this group (Qiu *et al.*, 2015). A clear phylogenetic distinction between  
308 the SQEF/Y motif-containing histone H2A and H2A.X, as defined by the presence of  
309 a monophyletic clade containing *Arabidopsis* H2A.X, appeared by the onset of more  
310 complex multicellular streptophytes (Charales and Zygnematales) (Figure 4D). This  
311 event occurred concurrently with the appearance of BCP1 and BCP4 (Figure 4D),  
312 suggesting a degree of coevolution with H2A.X.

313

### 314 **Conclusion**

315 Although the DNA repair machinery is highly conserved among eukaryotes, some of  
316 the most important regulators in animals have not yet been described in plants,  
317 including MDC1, a key mediator of DDR, as well as several other DDR-associated  
318 BRCT domain containing proteins (Lorkovic and Berger, 2017; Nisa *et al.*, 2019). Our  
319 survey of BRCT domain proteins in the plant lineage and characterization of  
320 *Arabidopsis* BCP1 and BCP4 proteins revealed functional properties that are related  
321 to that of metazoan MDC1. BCP4 bound to phosphorylated H2A.X *in vitro* and co-  
322 localized with DNA damage-induced foci *in vivo* in an H2A.X-dependent manner.  
323 Although plant BCP4 proteins do not contain all the sequence motifs found in human  
324 MDC1, our conclusion is further supported by the observation that metazoan MDC1  
325 proteins, in terms of the presence of different functional motifs, gradually increased in  
326 complexity during evolution. The only common feature of MDC1 between  
327 opisthokonts and plants is the presence of the C-terminal tBRCT domain that binds  
328  $\gamma$ H2A.X and this feature should be used in future studies to find orthologs of MDC1.  
329 The recruitment of downstream effectors of DDR is presumably mediated by distinct  
330 sequence motifs and adaptor proteins that co-evolved with MDC1 independently in  
331 the major phylogenetic groups. In mammals MDC1 acts as a scaffold for recruitment  
332 of DDR effectors (Coster and Goldberg 2010) through interactions with domains N-  
333 terminal of the tBRCT domain. In addition to the tBRCT domain, BCP4 contains three  
334 conserved regions that could potentially mediate interaction with a set of DDR  
335 effectors that may be shared with animals or plant specific. One of the plant specific  
336 adaptors could be BCP1 which, like human PAXIP1 (Gong *et al.*, 2009), localized to  
337 DNA damage induced foci in a  $\gamma$ H2A.X interaction independent manner (this work). In

338 support to this idea, *bcp1* mutants show reduced homologous recombination rates  
339 (Fan *et al.*, 2022; Vladejić *et al.*, 2022; Yu *et al.*, 2023), in a manner comparable to  
340 PAXIP1-depleted chicken and HeLa cells (Wang *et al.*, 2010). These data together  
341 further support our notion that BCP1 may be a functional homolog of PAXIP1 acting  
342 downstream of  $\gamma$ H2A.X recognition while BCP4 evolved as the ortholog of MDC1.

343 In conclusion, plants do contain functional homologue of mediator of DNA  
344 damage response (MDC1) that evolved independently from Opisthokont MDC1 and  
345 acquired motifs distinct from those found in metazoan MDC1.

346

### 347 **Outlook and limitations of the study**

348 Our work could serve as a framework that can be further expanded in the future by  
349 functional analyses of these motifs and identification of potential binding factors by  
350 either direct candidate approach *in vitro* or by more direct approaches, such as  
351 proximity labeling proteomics (e.g. Bio or Turbo-ID) *in vivo*. In that respect it is  
352 important to note that in plants we still do not understand how MRN complex is  
353 recruited to DNA damage. Furthermore, genetic interactions between BCP4 and  
354 BCP1 and of BCP4 and BCP1 with other components of the DDR and DNA repair  
355 machineries need to be investigated to unambiguously place these two proteins into  
356 the network of DNA damage sensing and repair.

357

### 358 **Materials and Methods**

#### 359 **Identification of *Arabidopsis* BRCT proteome**

360 We downloaded the full complement of human BRCT domain proteins (Woods *et al.*,  
361 2012) and performed BLAST searches on TAIR10 with each of them. All *Arabidopsis*  
362 hits were then analyzed on ScanProsite and InterProScan to identify BRCT and other  
363 annotated domains. In the next step, we used BRCT domains from identified proteins  
364 for BLAST searches on TAIR10 with iterations with new BRCT hits until no new ones  
365 were detected. All new hits were collected and analyzed on ScanProsite,  
366 InterProScan, and Uniprot to identify BRCT and other conserved domains.

367 To identify homologs of BCP1-4 in other plant species, *Arabidopsis* BRCT  
368 domain protein sequences were used in BLAST searches of Phytozome  
369 (<https://phytozome.jgi.doe.gov/pz/portal.html>), Fernbase (<https://www.fernbase.org/>),  
370 ORCAE (<https://bioinformatics.psb.ugent.be/orcae/overview/Chbra>), waterlilyPond  
371 (<http://waterlily.eplant.org/>) and MarpolBase (<https://marchantia.info/>) websites. All

372 sequences were aligned with CLC Genomics Workbench 11.0 and sequences with  
373 long insertions or deletions were removed before performing final alignments and  
374 phylogenetic analysis with CLC Genomics Workbench 11.0.

375 Metazoan MDC1 proteins were identified by NCBI BLAST searches and  
376 manually inspected for the presence of conserved motifs present in human MDC1.

377

### 378 **Evolutionary reconstruction of proteins in Archaeplastida using clustering-** 379 **based protein identification and phylogenetic analysis**

380 To reconstruct the evolutionary history of H2A.X and BCP proteins in plant, we  
381 constructed orthologous gene clusters (*i.e.* orthogroups) in 49 representative  
382 proteome datasets from Archaeplastida comprising 46 genomes and three  
383 transcriptomes from two Rhodophidia and one Glaucophyta (Source data file 5).  
384 Orthofinder v2.5.2 (Emms and Kelly, 2019) was used to cluster genes in a non-  
385 biased way by comparing each gene to the entire proteome dataset (>0.9 million  
386 proteins). After testing different parameters, we chose DIAMOND (Buchfink *et al.*,  
387 2015) or homology search with '-S diamond\_ultra\_sens' and adjusted inflation  
388 parameter '-I 2' based on previously validated BRCT proteome. The absence and  
389 presence of proteins (or domains) after manual correction of proteins were visualized  
390 next to the species tree using iTOL v6.7 (Letunić and Bork, 2021). The internal  
391 relationships within the class-level in the species tree were modified based on the  
392 Orthofinder output species tree, and higher taxonomic relationships (class or higher  
393 ranks) were verified based on currently accepted phylogenies (Leebens-Mack *et al.*,  
394 2019). MAFFT v7.310 (Kato and Standley 2013) was used to align protein  
395 sequences based on orthogroups. Individual maximum likelihood gene trees were  
396 built with IQ-TREE v2.1.2 (Minh *et al.*, 2020, which used model selection ('-m TEST')  
397 and an ultrafast bootstrap approximation approach (1,000 bootstrap replicates; '-bb  
398 1000').

399

### 400 **Plant material and growth conditions**

401 All *A. thaliana* plants used in this study are from the Colombia ecotype (Col-0). Single  
402 T-DNA insertion mutant BCP1-4 lines were obtained from the Nottingham  
403 Arabidopsis Stock Centre. *bcp1-1* (SALK\_022790), *bcp1-2* (SALK\_001578), *bcp4-1*  
404 (SAIL\_1222\_D03), *bcp4-2* (SALK\_038422) *bcp3-1* (SALK\_111173) *bcp2-1*  
405 (SALK\_025100.24.70.x) and *bcp2-2* (SAIL\_13\_D01) homozygous T-DNA insertions

406 were verified by PCR genotyping (Table 1). Mutant lines *hta7* (GK\_149G05); *hta3*  
407 (SALK\_012255) and *hta5* (SAIL\_382\_B11) were previously described (Lorković *et*  
408 *al.*, 2017; Yelagandula *et al.*, 2014).

409 Plants for genotyping or generating transgenic lines were grown in fully  
410 automated climate chambers under long day conditions (16 hours light, 8 hours  
411 dark). Plants used for DNA damage sensitivity assays, selection of transgenic lines,  
412 H2A.X phosphorylation assays following DNA damage treatment, and  
413 immunofluorescence analyses were grown on MS plates under sterile, long day  
414 conditions (light intensity: 50  $\mu\text{M}/\text{m}^2/\text{sec}$ ).

415

#### 416 **Analysis of DNA damage sensitivity**

417 To assess *bcp* mutants for sensitivity to DNA damage, sterilized seeds (64 seeds per  
418 replicate) were germinated on MS plates containing 20  $\mu\text{g}/\text{ml}$  zeocin (Invitrogen).  
419 True leaf development was scored 14 days after germination with replicate numbers  
420 shown on each panel (Lorkovic *et al.*, 2017).

421

#### 422 **Generation of transgenic lines expressing BCP1, BCP3, and BCP4 mClover3** 423 **fusion proteins**

424 For complementing *Arabidopsis bcp* mutant lines, DNA fragments of *BCP* genes (full  
425 genomic sequence) with the respective endogenous promoter (~1000 nucleotides  
426 upstream of start codon) were fused to the N-terminus of fluorescent protein-tag  
427 (mClover3) into the T-DNA binary vector pCBK02 (with either BASTA or  
428 spectinomycin selection marker) by using the Gibson assembly method. Plasmids  
429 were transformed into *A. tumefaciens* strain GV3101 and *Arabidopsis* plants  
430 transformed by floral dip method. Seeds from T3 transgenic lines, which were  
431 confirmed to be homozygous, were evaluated for complementation by true leaf assay  
432 and were also used for immunostaining.

433

#### 434 **Analysis of H2A.X phosphorylation in *bcp* mutant lines**

435 300 mg of 12-14 days old WT and *bcp1-4* mutant seedlings grown on vertical MS  
436 plates were transferred into liquid MS media in the presence or absence of 20  $\mu\text{g}/\text{ml}$   
437 bleomycin (Calbiochem). Following vacuum infiltration for 2 min, seedlings were  
438 incubated for 2 hours under light on a shaker. After removal of excess medium,  
439 seedlings were frozen in liquid nitrogen and stored at  $-70^\circ\text{C}$  until further use. Nuclei

440 were isolated as described in Lorkovic *et al.*, (2017) and stored at -20°C. Western  
441 blots were performed according to standard procedures using a  $\gamma$ H2A.X antibody  
442 (SigmaAldrich, H5912). H2A.X (Yelagandula *et al.*, 2014) and H3 (Abcam, ab1791)  
443 antibodies served as loading control for normalization. Primary antibodies were used  
444 at 1:1,000 dilution and secondary goat anti-rabbit IgG coupled to HRP at 1:10,000  
445 dilution.

446

#### 447 **Cloning *BCP1*, *BCP3*, and *BCP4* cDNAs and their tBRCT domains into bacterial** 448 **expression vectors**

449 Full length *BCP1* and *BCP4* cDNAs were amplified by RT-PCR from RNA isolated  
450 from WT seedlings treated with 20  $\mu$ g/ml bleomycin for 2 hours. RNA was isolated  
451 using the Spectrum Plant Total RNA-Kit (SigmaAldrich), following the manufacturer's  
452 protocol. Reverse transcription was done with the RevertAid H Minus First Strand  
453 cDNA Synthesis Kit (Thermo Fisher Scientific), following the manufacturer's protocol.  
454 For PCR amplification, 1  $\mu$ l of the RT reaction was used with gene specific primers  
455 (Table 1) for cloning. *BCP1* was cut with *NdeI/SalI* and cloned into pET28a  
456 (Novagen), *BCP3* was cut with *NdeI/SalI* and cloned into pET28a (Novagen), *BCP4*  
457 was cut with *NdeI/BamHI* and cloned into pET15b (Novagen). tBRCT domains of  
458 *BCP1*, *BCP3* and *BCP4* were amplified (Table 1) from the cDNA clones above and  
459 cloned into *BamHI/SalI* (*BCP1* tBRCT-N, *BCP3* tBRCT, and *BCP4* tBRCT) and  
460 *BglII/SalI* (*BCP1* tBRCT-C) of pGEX-4T-1.

461

#### 462 **Expression and purification of *BCP1* and *BCP4* from insect cells**

463 The VBCF ProTech Facility (VBCF; <https://www.viennabiocenter.org/vbcf/protein-technologies/>) used the *BCP1* and *BCP4* pET expression plasmids described above  
464 to generate His<sub>6</sub>-tagged versions (both N-terminal and C-terminal) in a baculovirus  
465 expression system. After selecting proper expression conditions, two liters of cells  
466 were collected and stored at -70°C until further use.

468 Cells were thawed and resuspended in 20 ml lysis buffer (50 mM HEPES pH  
469 7.5, 500 mM NaCl, 20 mM imidazole, 2  $\mu$ l/ml Benzonase) containing protease  
470 inhibitors (Roche) and sonicated for 2 min (5''on/5''off, 40% amplitude). After  
471 centrifugation for 30 min at 20,500  $\times$  g, the supernatant was transferred into new tube  
472 and 750  $\mu$ l of Ni-NTA agarose (Qiagen), washed with lysis buffer, were added, and  
473 incubated for one hour at 4°C on a rotating wheel. Beads with bound proteins were

474 collected by short centrifugation and transferred into a disposable gravity column.  
475 The column was washed with 5 ml of lysis buffer, followed by five washes with 5 ml of  
476 wash buffer (50 mM HEPES-KOH pH 7.5, 500 mM NaCl, 40 mM imidazole). Proteins  
477 were eluted in 300 µl fractions with elution buffer (50 mM HEPES pH 7.5, 500 mM  
478 NaCl, 500 mM imidazole). Fractions were analyzed with SDS-PAGE and fractions  
479 containing eluted protein were pooled, concentrated to 500 µl, and stored at -20°C  
480 until further use.

481 Affinity purified samples were further purified by size exclusion chromatography  
482 over a Superdex 200 10/300 GL column (GE Healthcare) with running buffer (50 mM  
483 Tris-HCl pH 7.5, 500 mM NaCl, 0.05% NP-40, 1 mM DTT) using an NGC-MPLC  
484 System (Bio-Rad) and analyzed with the ChromLab Software (Bio-Rad). Peak  
485 fractions were analyzed by SDS-PAGE and those displaying desired purity of the  
486 protein stored at -70°C.

487

#### 488 **Expression and purification of GST-tagged tBRCT domains**

489 BL21 (DE3) RIL *E. coli* cells transformed with plasmids for expression of tBRCT  
490 domains from pGEX-4T-1 were grown at 37°C overnight in 200 ml LB. Cultures were  
491 diluted in 2 L of LB and grown for three hours at RT and then induced for 5-7 hours at  
492 RT with 1 mM IPTG. Cells were collected and resuspended in 20 ml of extraction  
493 buffer (50 mM Tris-HCl pH 8.0, 1 M NaCl, 1 mM DTT, 0.1% Triton X-100) containing  
494 protease inhibitors (Roche), 30 µl of benzonase (1 mg/ml) and 50 mg of lysozyme.  
495 After sonication for 10 min at high intensity (15"on/15"off) and 5 min at medium  
496 intensity (15"on/15"off) extracts were centrifuged for 15 min at 4°C at 40,000 × *g*.  
497 Extracts were incubated with 300 µl of GSH agarose beads (Cytiva) at RT for one  
498 hour and then transferred to disposable columns and washed with 5 column volumes  
499 of extraction buffer. Proteins were eluted with six 300 µl elution steps with 50 mM  
500 Tris-HCl pH 8.0, 500 mM NaCl buffer containing 20 mM reduced glutathione and 1  
501 mM DTT. Fractions were analyzed on 10-12% SDS-PAGE, pooled, and buffer was  
502 exchanged into 50 mM Tris-HCl pH 8.0, 0.5 M NaCl, 1 mM DTT.

503

#### 504 **Interaction of BCP4 with phosphorylated H2A.X**

505 Peptide binding assays were performed as described by Stucki *et al.* (2005).  
506 Biotinylated peptides (25 µg) corresponding to the C-terminal tail of H2A.X, in  
507 phosphorylated and unphosphorylated form (biotin-PSKVGKNKGDIGSASQEF-OH

508 and biotin-PSKVGKNKGDIGSASpQEF-OH), were bound to 10  $\mu$ l of streptavidin  
509 magnetic beads (Invitrogen) in 500  $\mu$ l of binding buffer (50 mM Tris-HCl pH 7.5, 150  
510 mM NaCl, 0.05 % NP-40) for 30 min at room temperature. After washing the beads  
511 with binding buffer, purified proteins were diluted with binding buffer to obtain a buffer  
512 with a final concentration of 150 mM NaCl and mixed with streptavidin beads. From  
513 this step on, the binding buffer contained PhosStop (Roche) to prevent unwanted  
514 dephosphorylation of the peptides. Reactions were incubated on a rotator at 4°C for  
515 2 hours. After three washes with 500  $\mu$ l of binding buffer, beads were resuspended in  
516 1  $\times$  SDS-PAGE loading buffer, denatured, and run on 10% SDS-PAGE. Gels were  
517 stained with Coomassie blue, and images were acquired with the ChemiDoc imaging  
518 system (BioRad).

519

#### 520 **Immunofluorescence on isolated nuclei**

521 Approximately 15 seedlings were incubated in MS media either with or without  
522 bleomycin (20  $\mu$ g/ml) for 2 hours. After washing with MS medium, seedlings were  
523 fixed in Tris buffer (10 mM Tris-HCl pH 7.5, 10 mM EDTA, 100 mM NaCl) containing  
524 4% formaldehyde for 20 min. Samples were washed once with Tris buffer and once  
525 with LB01 buffer (15 mM Tris-HCl pH 7.5, 2 mM EDTA, 0.5 mM spermine, 80 mM  
526 KCl, 20 mM NaCl, 0.1% Triton X-100). Fixed material was homogenized to a fine  
527 suspension by chopping with razor blades in a petri dish in 400  $\mu$ l of LB01 buffer and  
528 filtered through a 40  $\mu$ m cell strainer into an Eppendorf tube. The suspension was  
529 washed with 400  $\mu$ l of LB01 buffer in the Petri dish, pipetted through the cell strainer  
530 into the same Eppendorf tube, and finally the mesh was also washed with 400  $\mu$ l of  
531 LB01 buffer. Samples were spun for 2 min at 2,000  $\times$  g at 4°C, the supernatant was  
532 discarded, and the pellet was resuspended in 500  $\mu$ l of LB01 buffer and kept on ice  
533 for ~10 min. This step was repeated until the pellet was no longer green. Finally,  
534 nuclei were pelleted for 2 min at 1,000  $\times$  g at 4°C and resuspended in 100  $\mu$ l of LB01  
535 buffer. Of this suspension, 10  $\mu$ l were transferred to a microscopic slide and dried  
536 completely at room temperature. Dried nuclei were fixed in 4% formaldehyde in PBS  
537 at room temperature for 30 min followed by two 5 min washes in PBS. Nuclei were  
538 blocked in 1% bovine serum albumin in PBS in a moist chamber at 37°C for 30 min  
539 followed by one 5 min wash in PBS. Samples were incubated with primary antibodies  
540 diluted 1:100 (rabbit pAb  $\alpha$ - $\gamma$ H2A.X from SigmaAldrich, H5912 and mouse mAb  $\alpha$ -  
541 GFP from Roche, 11814460001) in 1% BSA (in PBS) and incubated in a moist



542 chamber at 37°C for 2 hours. After three washes in PBS for 10 min, samples were  
543 incubated with Alexa flour labelled secondary antibodies (Invitrogen) diluted 1:200 in  
544 1% BSA (in PBS) in a moist chamber at 37°C for 30 min followed by three washes in  
545 PBS for 5 min. Slides were mounted in Vectashield (Vector laboratories) containing  
546 DAPI (1µg/ml), sealed, and stored at 4°C.

547 Microscopy was performed at the IMP/IMBA/GMI BioOptics facility using a LSM  
548 laser scanning confocal microscope (LSM720 Axio Observer, Zeiss). Images were  
549 analyzed with ZEN software (Zeiss).

550

### 551 **Data Availability**

552 This study includes no data deposited in external repositories.

553

### 554 **Acknowledgements**

555 We thank members of the Berger lab for their comments and helpful discussion. We  
556 thank Dr. Nicholas Irwin for sharing pipelines used for evolutionary reconstruction of  
557 *BCP* genes. Authors acknowledge support from PlantS and ProTech facilities at the  
558 Vienna BioCenter Core Facilities (VBCF), and the BioOptics facility and Molecular  
559 Biology Services from IMP/IMBA/GMI, and Dr. J. Matthew Watson for proof-reading  
560 the manuscript. This work was funded by core funding provided by the Gregor  
561 Mendel Institute.

562

### 563 **Author contributions**

564 **Zdravko Lorković:** Conceptualization; methodology; formal analysis; investigation;  
565 supervision; validation; writing – original draft; writing – review and editing. **Michael**  
566 **Klingenbrunner:** Investigation; methodology; formal analysis. **Chung Hyun Cho:**  
567 Investigation; methodology; formal analysis. **Frederic Berger:** Conceptualization;  
568 formal analysis; supervision; funding acquisition; writing – original draft; writing –  
569 review and editing.

570

### 571 **Disclosure and competing interests statement**

572 The authors have no competing interests.

573

### 574 **Figure legends**

575 **Figure 1. Identification of *Arabidopsis* proteins with BRCT domains.** (A)  
576 Schematic representation of 21 *Arabidopsis* proteins containing BRCT domains. The  
577 gene codes, protein names, and length in amino acids (aa) are indicated. (B) Human  
578 and *Arabidopsis* BRCT domain proteins were aligned with MUSCLE and a maximum  
579 likelihood circular cladogram was generated with CLC Genomics Workbench ver.  
580 11.0. (C) Sequence alignment of *Arabidopsis* BCP3 and BCP4 and human MDC1  
581 and PAXIP1 tBRCT domains. For alignment, tBRCT of PAXIP1 was used. Residues  
582 conserved in all four proteins are shaded green and those similar in at least three  
583 proteins are shaded blue. Structural elements of domains are indicated on the top of  
584 the alignment according to Stucki *et al.*, (2005). (D) All human and *Arabidopsis*  
585 tBRCT domains were aligned as in (B) and a maximum likelihood tree illustrating  
586 amino acid sequence conservation between tBRCT domains was generated with  
587 CLC Genomics Workbench ver. 11.0. In (B) and (C), human and *Arabidopsis*  
588 homologs share the same color code. *Arabidopsis* proteins and tBRCT domains  
589 clustering with human MDC1 and PAXIP1 are indicated in red and shaded in purple.  
590

591 **Figure 2. Analysis of *bcp* mutants.** (A) DNA damage sensitivity of *BCP* mutant  
592 lines assessed by true leaf development assay. Mutants of H2A.X (*hta3 hta5*) and  
593 H2A.W.7 (*hta7*) histone variants with demonstrated DNA damage sensitivity were  
594 used as controls. Data are represented as a box plot with median and interquartile  
595 range (box) and minimal and maximal values (whiskers). The *p* values, relative to  
596 WT, were calculated using a two-tailed paired Student's *t*-test. (B) Analysis of  $\gamma$ H2A.X  
597 levels in *bcp* mutant seedlings after induction of DNA damage for two hours.  
598 Representative western blots for  $\gamma$ H2A.X and H2A.X in *BCP* mutants. Quantified  
599  $\gamma$ H2A.X data represent the mean  $\pm$ SD of three biological replicates (each in two  
600 technical replicates) normalized to the total H2A.X levels. n.s., not significant *p* values  
601 as revealed by two-tailed paired Student's *t*-test. (C) Analysis of  $\gamma$ H2A.X foci in nuclei  
602 of WT and *bcp* mutants. Maximum intensity projection images from Z-stacks of  
603 representative nuclei are shown and scale bars represent 5  $\mu$ m. (D) DNA damage  
604 sensitivity of *BCP*-mClover3 complementing lines. Bars represent means  $\pm$ SD. The *p*  
605 values, relative to WT, were calculated using a two-tailed paired Student's *t*-test. In  
606 (A) and (D), seeds were germinated on medium containing 20  $\mu$ g/ml of zeocin and  
607 true leaf development was scored 12 days after germination. Numbers of biological

608 replicates, each with 64 seedlings, are indicated on each plot. Uncropped images of  
609  $\gamma$ H2A.X and H2A.X western blots in *bcp* mutants are available in Source data file 1.

610

611 **Figure 3. BCP4 has properties similar to human MDC1.** (A) BCP4 binds  
612 phosphorylated H2A.X C-terminal peptide. Affinity pull-down with N- and C-terminally  
613 His-tagged BCP4 and biotinylated H2A.X peptides. (B) Affinity pull-down with GST-  
614 tagged tBRCT domain of BCP4. (C) The tBRCT domains of BCP1 do not bind  
615 phosphorylated H2A.X C-terminal peptide. Affinity pull-down with GST-tagged tBRCT  
616 domains and biotinylated H2A.X peptides. (D) BCP1 and BCP4 co-localize with  
617  $\gamma$ H2A.X foci. Immunostaining of nuclei from bleomycin treated seedlings expressing  
618 BCP1-mClover3 and BCP4-mClover3 in *bcp1* and *bcp4* mutants, respectively. BCP1  
619 (E) and BCP4 (F) foci formation requires H2A.X. Immunostaining of nuclei from  
620 bleomycin treated seedlings expressing BCP1-mClover and BCP4-mClover in *bcp1*  
621 *hta3 hta5* and *bcp4 hta3 hta5* genetic backgrounds, respectively. In (A-C) proteins  
622 were analyzed on 10% SDS-PAGE and gels were stained with Coomassie blue. In  
623 (D-F) maximum intensity projection images from Z-stacks of representative nuclei are  
624 shown. Scale bars represent 5  $\mu$ m. Uncropped images of affinity pull-downs shown in  
625 A-C are available in Source data file 2.

626

627 **Figure 4. Comparison of BCP4 and MDC1 sequence motifs.** (A) Schematic  
628 representation of human and *Arabidopsis* MDC1 proteins. Conserved sequence  
629 motifs are indicated, and consensus sequences of plant motifs are depicted at the  
630 bottom. (B) Summary of the appearance of BCP3/BCP4 sequence motifs across  
631 Viridiplantae. Open circles denote phylogenetic groups where motif is present in only  
632 a subset of analyzed species. A list of plant species and the corresponding protein  
633 sequences used for the analysis shown in A and B are available from Source data file  
634 3. (C) In metazoan, functional motifs identified in human MDC1 are unique to  
635 mammals. Numbers of MDC1 proteins from each phylogenetic group used for  
636 creation of cladogram are indicated in parentheses. A list of metazoan species and  
637 the corresponding protein sequences used for the analysis are available from Source  
638 data file 4. (D) Evolutionary trajectories of BCP1, BCP4, and H2A.X in  
639 Archaeplastida. Protein presence is displayed at the tip of each branch, and major  
640 groups are denotated next to phylogeny. For H2A.X, (i) the presence of H2A, (ii)  
641 SQEF or SQEF-like motifs, and (iii) the presence of a monophyletic clade containing

642 *Arabidopsis* H2A.X (Supporting Figure 5 and Source data file 5) were displayed  
643 separately.

644

645 **Supporting Figure 1. Phylogeny of BCP1, BCP3, and BCP4.** (A) Maximum  
646 likelihood tree of BCP1 across Viridiplantae. The schematic presentation of BCP1 is  
647 shown at the bottom and a PHD finger present in all BCP sequences except in  
648 *Brassicaceae* is indicated. (B) Maximum likelihood tree of BCP3 and BCP4 across  
649 Viridiplantae. In (A) and (B), major clades are indicated by differently colored  
650 shading. The non-flowering land plant clade includes sequences from hornworts,  
651 mosses, liverworts, lycophytes, and monilophytes. *Thuja plicata* was the only  
652 gymnosperm used in the analysis. A list of all plant species and the corresponding  
653 protein sequences used for the analysis are available from Source data file 3.

654

655 **Supporting Figure 2.** (A) Schematic representation of *Arabidopsis* BCP genes with  
656 exons indicated by gray boxes and introns by black lines. Exons and introns are  
657 drawn to scale according to the lengths of DNA sequences. Positions of T-DNA  
658 insertions in *bcp* mutant lines used for DNA damage sensitivity assays are indicated  
659 above each gene. (B) Alignment of BCP3 and BCP4 proteins. Identical and  
660 conserved amino acids are indicated in red and blue letters, respectively. The  
661 positions of introns are indicated by black arrows. The tBRCT domain and three other  
662 conserved regions are shown in colored boxes.

663

664 **Supporting Figure 3.** Sequence alignment of the PHD finger from BCP1 with  
665 cysteine residues shaded in green and histidine in blue. The consensus sequence is  
666 indicated at the bottom.

667

668 **Supporting Figure 4.** (A) Alignment of SQSQ, DWD, and DTQ sequence motifs from  
669 BCP4. The signature motifs are shaded in blue and green. (B) Schematic  
670 representation of invertebrate, vertebrate (except mammals), and mammalian MDC1  
671 proteins. Conserved domains and motifs are indicated. A list of all plant species and  
672 the corresponding protein sequences used for the analysis in A and B are available  
673 from Source data file 3.

674

675 **Supporting Figure 5.** Phylogeny of H2A and H2A variants from Archaeplastida H2A  
676 orthogroup. The phylogenetic positions of *Arabidopsis* H2A variants are marked in  
677 red. H2A.X sequences with a SQEF/Y motif or SQEF-like (SQ+E/D+F/I/L/V/Y) motif  
678 at the C-terminus are highlighted in blue. Note that in green algae, red algae, and  
679 glaucophytes H2A and SQEF/Y motif containing H2As do not form separate clades.

680

681 **Source data file 1.** Uncropped images of  $\gamma$ H2A.X and H2A.X western blots in *bcp*  
682 mutants. Each blot represents one biological and two technical replicates. Dotted  
683 boxes represent images presented in Figure 3B.

684

685 **Source data file 2.** (A) Uncropped images of affinity pull-down between His-tagged  
686 BCP4 and biotinylated H2A.X peptides. (B) Uncropped images of affinity pull-down  
687 using GST-tagged tBRCT domain of BCP4. (C) Uncropped images of affinity pull-  
688 down using GST-tagged tBRCT domain of BCP1. Dashed boxes correspond to  
689 images presented in Figure 3A-C.

690

691 **Source data file 3.** List of plant BCP1, BCP3, and BCP4 protein sequences used for  
692 creation of the phylogeny shown in Supporting Figure 1, for sequence alignments in  
693 Supporting Figure 3 and Supporting Figure 4, and for sequence motif analysis shown  
694 in Figure 4A and 4B.

695

696 **Source data file 4.** List of metazoan MDC1 protein sequences used for analysis  
697 shown in Figure 4C.

698

699 **Source data file 5.** Table of species used for evolutionary reconstruction of BCP1,  
700 BCP4, and H2A.X shown in Figure 4D.

701

## 702 **References**

703 Buchfink, B., Chao Xie, C., & Huson, D. H. (2015) Fast and sensitive protein  
704 alignment using DIAMOND. *Nat. Methods* 12:59-60. doi: 10.1038/nmeth.3176

705 Callebaut, I., & Mornon, J. P. (1997) From BRCA1 to RAP1: A widespread BRCT  
706 module closely associated with DNA repair. *FEBS Lett.* 400:25–30.

707 doi:10.1016/s0014-5793(96)01312-9

708 Callen, E., Di Virgili, M., Kruhlak, M. J., Nieto-Sole, M., Wong, N., Chen, H. T.,  
709 Faryabi, R. B., Polat, F., Santos, M., Starnes, L. M., et al. (2013) 53BP1 Mediates  
710 productive and mutagenic DNA repair through distinct phosphoprotein interactions.  
711 *Cell* 153:1266-1280. doi:10.1016/j.cell.2013.05.023

712 Chapman, J. R., & Jackson, S. P. (2008) Phospho-dependent interactions between  
713 NBS1 and MDC1 mediate chromatin retention of the MRN complex at sites of DNA  
714 damage. *EMBO Rep.* 9:795–801. doi.org/10.1038/embor.2008.103

715 Ciccia, A., & Elledge, S. J. (2010) The DNA damage response: making it safe to play  
716 with knives. *Mol. Cell* 40:179–204. doi: 10.1016/j.molcel.2010.09.019

717 Dronamraju, R., & Mason, J. M. (2009) Recognition of double strand breaks by a  
718 mutator protein (MU2) in *Drosophila melanogaster*. *PLoS Genet.* 5:e1000473. doi:  
719 10.1371/journal.pgen.1000473

720 Durocherr, D., & Jackson, S. P. (2002) The FHA domain. *FEBS Lett.* 513:58-66. doi:  
721 10.1016/s0014-5793(01)03294-x

722 Emms, D. M., & Kelly, S. (2019) OrthoFinder: phylogenetic orthology inference for  
723 comparative genomics. *Genome Biol.* 20:238. doi: 10.1186/s13059-019-1832-y

724 Escribano-Diaz, C., & Durocher, D. (2013) DNA repair pathway choice—a PTIP of the  
725 hat to 53BP1. *EMBO Rep.* 14: 665–666. doi: 10.1038/embor.2013.99

726 Fan, T., Kang, H., Wu, D., Zhu, X., Huang, L., Wu, J., & Zhu, Y. (2022) Arabidopsis  $\gamma$ -  
727 H2A.X-INTERACTING PROTEIN participates in DNA damage response and  
728 safeguards chromatin stability. *Nat. Commun.* 13(1):7942. doi: 10.1038/s41467-022-  
729 35715-2

730 Ferrand, J., Plessier, A., & Polo, S. E. (2020) Control of the chromatin response to  
731 DNA damage: Histone proteins pull the strings. *Semin. Cell. Dev. Biol.* 113:75-87.  
732 doi: 10.1016/j.semcdb.2020.07.002

733 Gong, Z., Cho, Y.-W., Kim, J.-E., Ge, K., & Chen, J. (2009) Accumulation of Pax2  
734 transactivation domain interaction protein (PTIP) at sites of DNA breaks via RNF8-  
735 dependent pathway is required for cell survival after DNA damage. *J. Biol. Chem.*  
736 284(11):7284-7293. doi: 10.1074/jbc.M809158200

737 Hale, C. J., Potok, M. E., Lopez, J., Do, T., Liu, A., Gallego-Bartolome, J., Michaels,  
738 S. D., & Jacobsen, S. E. (2016) Identification of multiple proteins coupling  
739 transcriptional gene silencing to genome stability in *Arabidopsis thaliana*. *PLoS*  
740 *Genet.* 12:e1006092 doi.org/10.1371/journal.pgen.1006092

- 741 Hari, F.J., Spycher, C., Jungmichel, S., Pavic, L., & Stucki, M. (2010) A divalent  
742 FHA/BRCT-binding mechanism couples the MRE11-RAD50-NBS1 complex to  
743 damaged chromatin. *EMBO Rep.* 11:387-92. doi: 10.1038/embor.2010.30
- 744 Jowsey, P. A., Doherty, A. J., & Rouse, J. (2004) Human PTIP facilitates ATM-  
745 mediated activation of p53 and promotes cellular resistance to ionizing radiation. *J.*  
746 *Biol. Chem.* 279:55562-55569. doi: 10.1074/jbc.M411021200
- 747 Kasravi, A., Walter, M. F., Brand, S., Mason, J. M., & Biessmann, H. (1999)  
748 Molecular cloning and tissue-specific expression of the mutator2 Gene (*mu2*) in  
749 *Drosophila melanogaster*. *Genetics* 152:1025–1035.  
750 doi.org/10.1093/genetics/152.3.1025
- 751 Katoh, K., & Standley, D. M. (2013) MAFFT multiple sequence alignment software  
752 version 7: improvements in performance and usability. *Mol. Biol. Evol.* 30:772-80. doi:  
753 10.1093/molbev/mst010
- 754 Kim, K., Kirby, T. W., Perera, L., & London, R. E. (2021) Phosphopeptide interactions  
755 of the Nbs1 N-terminal FHA-BRCT1/2 domains. *Sci. Rep.* 11:9046. doi:  
756 10.1038/s41598-021-88400-7
- 757 Kolas, N. K., Chapman, J. R., Nakada, S., Ylanko, J., Chahwan, R., Sweeney, F. D.,  
758 Panier, S., Mendez, M., Wildenhain, J., Thomson, T. M., Pelletier, L., Jackson, S. P.,  
759 & Durocher, D. (2007) Orchestration of the DNA-damage response by the RNF8  
760 ubiquitin ligase. *Science* 318:1637–1640. doi.org/10.1126/science.1150034
- 761 Lafarge, S., & Montané, M. H. (2003) Characterization of *Arabidopsis thaliana*  
762 ortholog of the human breast cancer susceptibility gene 1: AtBRCA1, strongly  
763 induced by gamma rays. *Nucleic Acids Res.* 31:1148-1155. doi:10.1093/nar/gkg202
- 764 Lanz, C. M., Dibitto, D., & Smolka, M. B. (2019) DNA damage kinase signaling:  
765 checkpoint and repair at 30 years. *EMBO J.* 38:e101801. doi:  
766 10.15252/emboj.2019101801
- 767 Leebens-Mack, *et al.*, One Thousand Plant Transcriptomes Initiative (2019) One  
768 thousand plant transcriptomes and the phylogenomics of green plants. *Nature*  
769 574:679-685. doi: 10.1038/s41586-019-1693-2.
- 770 Lechner, M. S., Levitan, I. & Dressler, G. R. (2000) PTIP, a novel BRCT domain-  
771 containing protein interacts with Pax2 and is associated with active chromatin.  
772 *Nucleic Acids Res.* 28:2741–2751. doi:10.1093/nar/28.14.2741

- 773 Letunić, I., & Bork, P. (2021) Interactive Tree Of Life (iTOL) v5: an online tool for  
774 phylogenetic tree display and annotation. *Nucleic Acids Res.* 49(W1):W293-W296.  
775 doi: 10.1093/nar/gkab301.
- 776 Leung, C. C. Y., & Glover, J. N. (2011) BRCT domains: easy as one, two, three. *Cell*  
777 *Cycle* 10:2461-2470. doi:10.4161/cc.10.15.16312
- 778 Lorković, Z. J., & Berger, F. (2017) Heterochromatin and DNA damage repair: Use  
779 different histone variants and relax. *Nucleus* 8:583–588.  
780 doi.org/10.1080/19491034.2017.1384893
- 781 Lorković, Z. J., Park, C., Goiser, M., Jiang, D., Kurzbauer, M. T., Schlögelhofer, P., &  
782 Berger, F. (2017) Compartmentalization of DNA damage response between  
783 heterochromatin and euchromatin is mediated by distinct H2A histone variants. *Curr.*  
784 *Biol.* 27:1192–1199. doi.org/10.1016/j.cub.2017.03.002
- 785 Lou, Z., Minter-Dykhouse, K., Franco, S., Gostissa, M., Rivera, M. A., Celeste, A.,  
786 Manis, J. P., van Deursen, J., Nussenzweig, A., Paull, T. T., Alt, F. W., & Chen, J.  
787 (2006) MDC1 maintains genomic stability by participating in the amplification of ATM-  
788 dependent DNA damage signals. *Mol. Cell* 21:187–200.  
789 doi.org/10.1016/j.molcel.2005.11.025
- 790 Mailand, N., Bekker-Jensen, S., Fastrup, H., Melander, F., Bartek, J., Lukas, C., &  
791 Lukas, J. (2007) RNF8 ubiquitylates histones at DNA double-strand breaks and  
792 promotes assembly of repair proteins. *Cell* 131:887–900.  
793 doi.org/10.1016/j.cell.2007.09.040
- 794 Malik, H. S., & Henikoff, S. (2003) Phylogenomics of the nucleosome. *Nat. Struct.*  
795 *Biol.* 10: 882-891. 10.1038/nsb996.
- 796 Manke, I. A., Lowery, D.M., Nguyen, A., & Yaffe, M. B. (2003) BRCT repeats as  
797 phosphopeptide-binding modules involved in protein targeting. *Science* 302:636-639.  
798 doi: 10.1126/science.1088877
- 799 Mathilde, G., Ghislaine, G., Daniel, V., & Georges, P. (2003) The *Arabidopsis* MEI1  
800 gene encodes a protein with five BRCT domains that is involved in meiosis-specific  
801 DNA repair events independent of SPO11-induced DSBs. *Plant J.* 35:465–475.  
802 doi.org/10.1046/j.1365-313X.2003.01820.x
- 803 Minh, B. Q., Schmidt, H. A., Chernomor, O., Schrempf, D., Woodhams, M. D., von  
804 Haeseler, A., & Lanfear, R. (2020) IQ-TREE 2: New models and efficient methods for  
805 phylogenetic inference in the genomic era. *Mol. Biol. Evol.* 37(5):1530-1534. doi:  
806 10.1093/molbev/msaa015



- 807 Mirman, Z., & de Lange, T. (2020) 53BP1: a DSB escort. *Genes Dev.* 34:7-23 doi:  
808 10.1101/gad.333237.119
- 809 Muñoz, I. M., Jowsey, P. A., Toth, R., & Rouse, J. (2007) Phospho-epitope binding by  
810 the BRCT domains of hPTIP controls multiple aspects of the cellular response to  
811 DNA damage. *Nucleic Acids Res.* 35:5312-22. doi: 10.1093/nar/gkm493
- 812 Nisa, M. U., Huang, Y., Benhamed, M., & Raynaud, C. (2019) The plant DNA  
813 damage response: Signaling pathways leading to growth inhibition and putative role  
814 in response to stress conditions. *Front. Plant Sci.* 10:653.  
815 doi.org/10.3389/fpls.2019.00653
- 816 Qiu, H., Price, D. C., Yang, E. C., Yoon, H. S., & Bhattacharya, D. (2015) Evidence of  
817 ancient genome reduction in red algae (Rhodophyta). *J. Phycol.* 51:624-636. doi:  
818 10.1111/jpy.12294
- 819 Reidt, W., Rebecca Wurz, R., Wanieck, K., Chu, H. H., & Holger Puchta, H. (2006) A  
820 homologue of the breast cancer-associated gene BARD1 is involved in DNA repair in  
821 plants. *EMBO J.* 25: 4326–4337. doi: 10.1038/sj.emboj.7601313
- 822 Rogakou, E. P., Boon, C., Redon, C., & Bonner, W. M. (1999). Megabase chromatin  
823 domains involved in DNA double-strand breaks *in vivo*. *J. Cell Biol.* 146:905-916. doi:  
824 10.1083/jcb.146.5.905.
- 825 Salguero, I., Belotserkovskaya, R., Coates, J., Sczaniecka-Clift, M., Demir, M., Jhujh,  
826 S., Wilson, M. D., & Jackson, S. P. (2019) MDC1 PST-repeat region promotes  
827 histone H2AX-independent chromatin association and DNA damage tolerance. *Nat.*  
828 *Commun.* 10:5191. doi.org/10.1038/s41467-019-12929-5
- 829 Spycher, C., Miller, E. S., Townsend, K., Pavic, L., Morrice, N. A., Janscak, P.,  
830 Stewart, G. S., & Stucki, M. (2008) Constitutive phosphorylation of MDC1 physically  
831 links the MRE11-RAD50-NBS1 complex to damaged chromatin. *J. Cell Biol.*  
832 181:227–240. doi.org/10.1083/jcb.200709008
- 833 Stewart, G. S., Wang, B., Bignell, C. R., Taylor, A., M. R., & Elledge, S. J. (2003)  
834 MDC1 is a mediator of the mammalian DNA damage checkpoint. *Nature* 421:961–  
835 966. doi.org/10.1038/nature01446
- 836 Stucki, M., Clapperton, J. A., Mohammad, D., Yaffe, M. B., Smerdon, S. J., &  
837 Jackson, S. P. (2005) MDC1 Directly binds phosphorylated histone H2AX to regulate  
838 cellular responses to DNA double-strand breaks. *Cell* 123:1213–1226.  
839 doi.org/https://doi.org/10.1016/j.cell.2005.09.038

840 Turinetto, V., & Giachino, C. (2015) Multiple facets of histone variant H2AX: a DNA  
841 double-strand-break marker with several biological functions. *Nucleic Acids Res.*  
842 43:2489–2498. doi:10.1093/nar/gkv061

843 Vladejić, J., Yang, F., Dvořák Tomaščíková, E., Doležel, J., Palecek, J. J., & Pecinka,  
844 A. (2022) Analysis of BRCT5 domain-containing proteins reveals a new component  
845 of DNA damage repair in *Arabidopsis*. *Front. Plant Sci.* 13:1023358. doi:  
846 10.3389/fpls.2022.1023358

847 Yelagandula, R., Stroud, H., Holec, S., Zhou, K., Feng, S., Zhong, X., Muthurajan, U.  
848 M., Nie, X., Kawashima, T., Groth, M., Luger, K., Jacobsen, S. E., & Berger, F.  
849 (2014). The histone variant H2A.W defines heterochromatin and promotes chromatin  
850 condensation in *Arabidopsis*. *Cell* 158:98–109. doi.org/10.1016/j.cell.2014.06.006

851 Yoshiyama, K. O. (2016) SOG1: a master regulator of the DNA damage response in  
852 plants. *Genes Genet. Syst.* 90:209-216. doi: 10.1266/ggs.15-00011

853 Yoshiyama, K., Conklin, P. A, Huefner, N. D, & Britt, A. B. (2009) Suppressor of  
854 gamma response 1 (SOG1) encodes a putative transcription factor governing  
855 multiple responses to DNA damage. *Proc. Natl. Acad. Sci. USA* 106:12843-12848.  
856 doi: 10.1073/pnas.0810304106

857 Yu, X., Christiano, C., Chini, S., He, M., Mer, G., & Chen, J. (2003) The BRCT  
858 domain is a phospho-protein binding domain. *Science* 302:639-642. doi:  
859 10.1126/science.1088753

860 Yu, C., Hou, L., Huang, Y., Cui, X., Xu, S., Wang, L., & Yan, S. (2023) The multi-  
861 BRCT domain protein DDRM2 promotes the recruitment of RAD51 to DNA damage  
862 sites to facilitate homologous recombination. *New Phytol.* 238:1073-1084. doi:  
863 10.1111/nph.18787

864 Zhang, J., Ma, Z., Treszezamsky, A., & Powell, S. N. (2005) MDC1 interacts with  
865 Rad51 and facilitates homologous recombination. *Nat. Struct. Mol. Biol.* 12:902–909.  
866 <https://doi.org/10.1038/nsmb991>

867  
868  
869  
870  
871  
872  
873

874  
875  
876  
877  
878  
879  
880  
881  
882  
883  
884  
885  
886  
887

**Table 1. Oligonucleotides used for genotyping and cloning.**

| <b>Oligonucleotides used for genotyping</b> |                                           |
|---------------------------------------------|-------------------------------------------|
| BCP1-1-LP                                   | AGATTTGAATGGGATTCCAGG                     |
| BCP1-1-RP                                   | CCAAAGTATCAGTCTCTGGCG                     |
| BCP1-2-LP                                   | GATGGTCTTTCTCTTCTGGGG                     |
| BCP1-2-RP                                   | CGCCAGAGACTGATACTTTGG                     |
| BCP4-1-LP                                   | ACGAACATGGAGTTTCTGGTG                     |
| BCP4-1-RP                                   | CTTTTACTTGCAACGCCAAAG                     |
| BCP4-2-LP                                   | CTGCCTTGCATTCTTTTCAAG                     |
| BCP4-2-RP                                   | TGTAAGACAACCTCGCCTCACC                    |
| BCP3-LP                                     | CACGCATCAAATCTAGCCAAG                     |
| BCP3-RP                                     | ATCTTCAATTTCCCCACATCC                     |
| BCP2-1-LP                                   | TTGTTGGGCAGACAAAGAATC                     |
| BCP2-1-RP                                   | GAGTTTTCTGACTTTTCCGG                      |
| BCP2-2-LP                                   | GAGTTTTCTGACTTTTCCGG                      |
| BCP2-2-RP                                   | TTGTTGGGCAGACAAAGAATC                     |
| H2A.X.3-LP                                  | ATCACTCCACTCACAAAATCCTC                   |
| H2A.X.3-RP                                  | TGGAACAGAGAGCCATGTCTATG                   |
| H2A.X.5-LP                                  | CCTAAAGCCCACTCATCTTCTC                    |
| H2A.X.5-RP                                  | CGAATCCAAACAAGAGAACTGAAC                  |
| <b>Oligonucleotides used for cloning</b>    |                                           |
| BCP1 <b>Nde</b> -28a                        | ATCAT <b>CATATG</b> CAATCGGATTCGGGTTTGCC  |
| BCP1 <b>Sal</b> -28a                        | GCTCAGT <b>CGACTT</b> AATGGTACACACACAAATC |
| BCP4 <b>Nde</b> -15b                        | ACCTC <b>CATATG</b> GCTAAATCTAACCAAAACTT  |

|                              |                                                  |
|------------------------------|--------------------------------------------------|
| BCP4 <b>Bam</b> -15b         | GCTCT <b>GGATCC</b> TTACCCGCTACGACGTTGGA         |
| BCP3 <b>Nde</b> -28a         | ATCAT <b>CATATG</b> GAAACCGAAGATTTGCCTC          |
| BCP3 <b>Sal</b> -28a         | GTTGCG <b>TCGACT</b> TATAATCTCTGATTTTGGT         |
| BCP1tBRCT1 <b>Bam</b> HI-4T1 | CTAAT <b>GGATCC</b> TTGCCTCCCAAGACGTATTCCG       |
| BCP1tBRCT <b>Sal</b> -4T1    | CTAAC <b>GTCGAC</b> CTACTCGTAATCAACCTCAGGTAG     |
| BCP1tBRCT2 <b>Bgl</b> II-4T1 | CTAAT <b>AGATCT</b> GTCTTCCAGGACCAAGAACATG       |
| BCP1tBRCT2 <b>Sall</b> -4T1  | CTAAT <b>GTCGAC</b> CTAACAAACGTACTCCACCAGGTAATCG |
| BCP3tBRCT <b>Bam</b> HI-4T1  | CTAAT <b>GGATCC</b> GGTAAAATAGGTGACTTCGTG        |
| BCP3tBRCT <b>Sal</b> -4T1    | CTAAC <b>GTCGACT</b> TATAATCTCTGATTTTGGTG        |
| BCP4tBRCT <b>Bam</b> HI-4T1  | CTAAT <b>GGATCC</b> ATCTCCGAGACAAAGAGTACTAG      |
| BCP4tBRCT <b>Sal</b> -4T1    | CTAAC <b>GTCGACT</b> TACCCGCTACGACGTTGGAAC       |

888

889

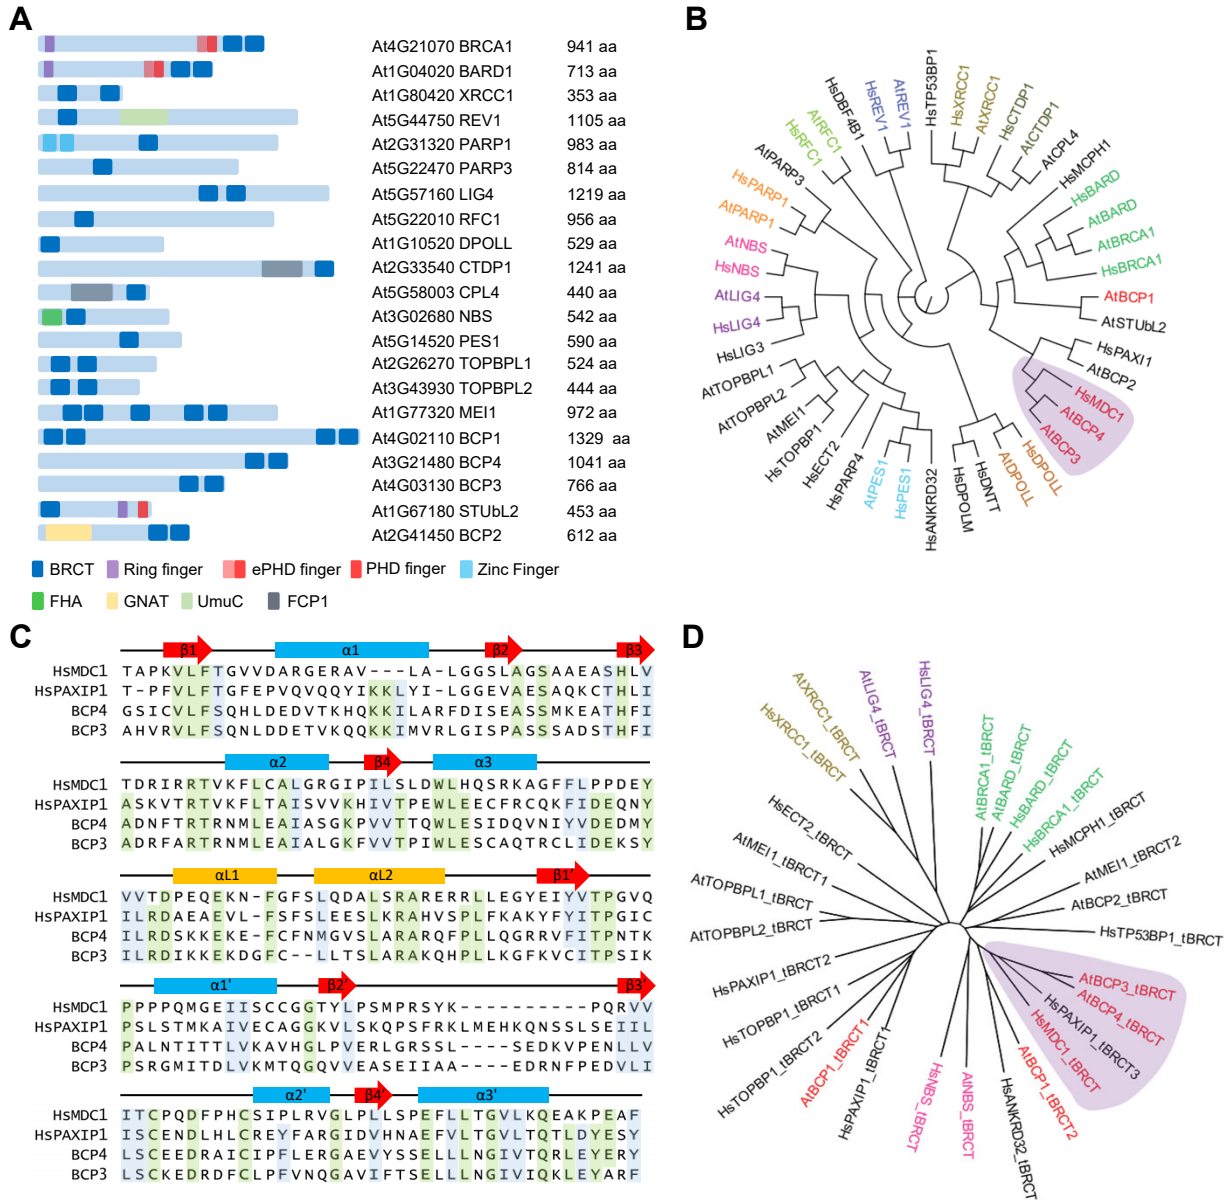

Figure 1

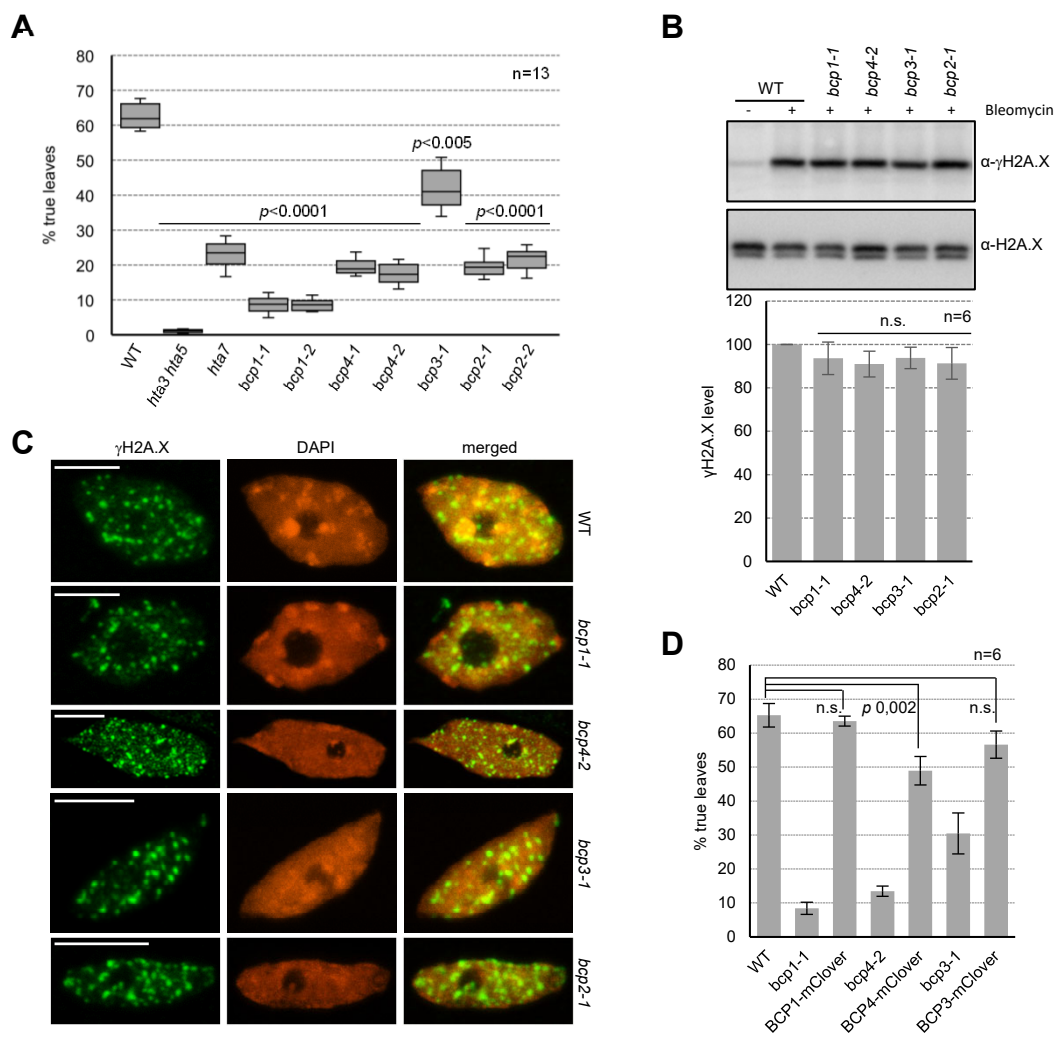

Figure 2

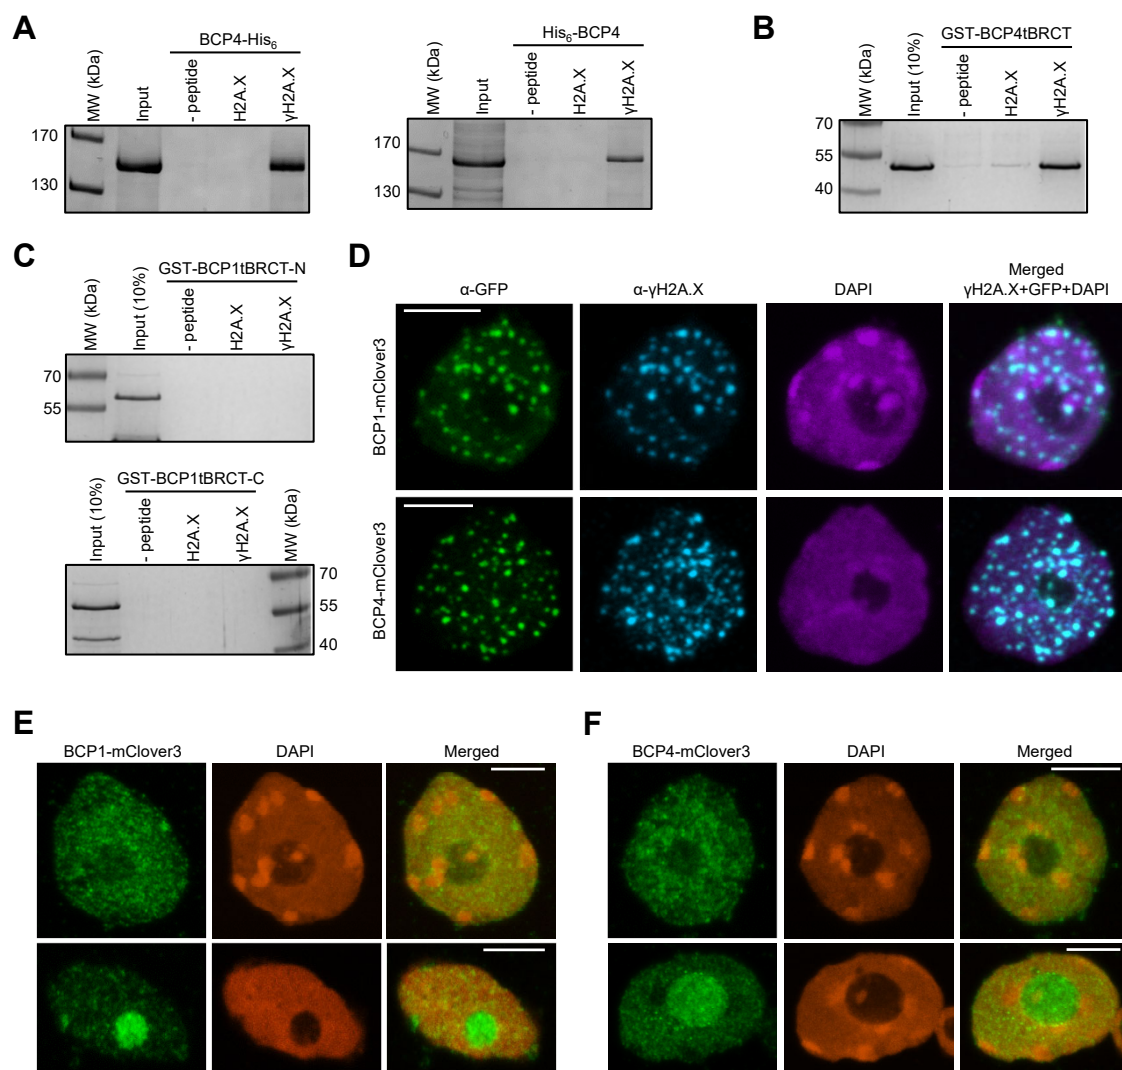

Figure 3

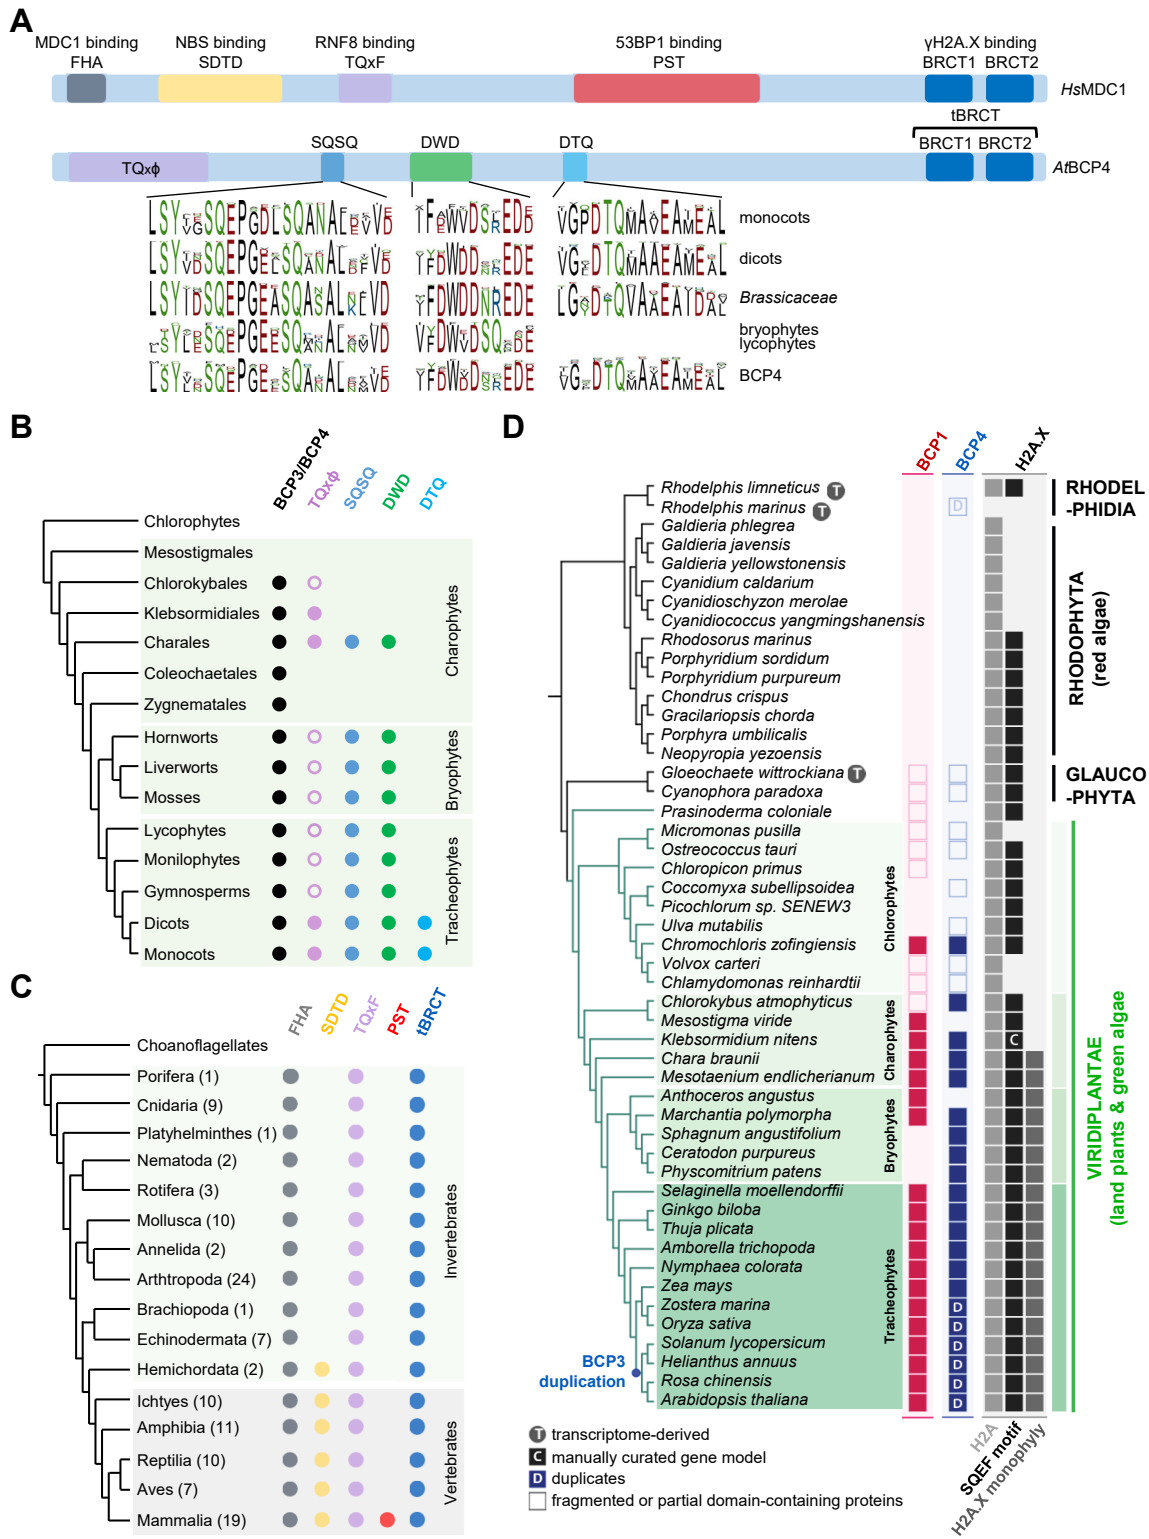

Figure 4
